# Supplementary material for: Design and investigation of targeting agent orientation and density on nanoparticles for enhancing cellular uptake efficiency
Source: Royal Society of Chemistry journal article supplement (doi:10.1039/d3tb01375h), 2023-01-01
Supplement: d3tb01375h1.pdf [file d3tb01375h1.pdf]

## Supporting Information

# Design and Investigation of Targeting Agent Orientation and Density on Nanoparticles for Enhancing Cellular Uptake Efficiency

Weiwei Fei, Xiuli Wang, Jia Guo, and Changchun Wang\*

State Key Laboratory of Molecular Engineering of Polymers, Department of  
Macromolecular Science, and Laboratory of Advanced Materials, Fudan University,  
Shanghai 200433, P. R. China.

\*Corresponding author: ccwang@fudan.edu.cn (C.C. Wang)

### Calculation of ligand density

The average number of ligands binding on the nanoparticle was calculated by a mathematical method. The ligand density ( $D_{\text{ligand}}$ , ligands per  $\text{nm}^2$ ) on the nanoparticle surface could be obtained by the following equation:

$$M_{\text{NP}} = \frac{4\pi r^3 \rho}{3w}$$

$$S_{\text{NP}} = 4\pi R^2$$

$$D_{\text{ligand}} = \frac{M_{\text{NP}} \times Q \times N_A}{S_{\text{NP}} \times M} = \frac{r^3 \rho Q N_A}{3w M R^2}$$

Where,  $M_{\text{NP}}$  is the mass of one MSP-AOPB nanoparticle,  $r$  is the radius of  $\text{Fe}_3\text{O}_4$  core measured by TEM,  $\rho$  is the density of  $\text{Fe}_3\text{O}_4$ ,  $w$  is the mass fraction of  $\text{Fe}_3\text{O}_4$  in the MSP-AOPB nanoparticle,  $S_{\text{NP}}$  is the surface area of one MSP-AOPB nanoparticle,  $R$  is the radius of MSP-AOPB nanoparticle measured by DLS,  $Q$  is the transferrin (Tf) binding amount on the MSP-AOPB nanoparticle,  $N_A$  is the Avogadro constant,  $M$  is the molecular weight of Tf.

| Parameter | Value                  |
|-----------|------------------------|
| $r$       | 120 nm                 |
| $R$       | 287 nm                 |
| $\rho$    | 5.18 g/cm <sup>3</sup> |
| $w$       | 49.5%                  |
| $N_A$     | $6.02 \times 10^{23}$  |
| $M$       | 79 kDa                 |

**Table S1** Hydrodynamic diameters, PDI and zeta potentials of MSP, MSP-PGMA, MSP-IDA and MSP-AOPB.

| <b>Sample</b> | <b><math>D_h</math> (nm)</b> | <b>PDI</b> | <b>Zeta-potential (mV)</b> |
|---------------|------------------------------|------------|----------------------------|
| MSP           | 313                          | 0.187      | $-22.3 \pm 0.5$            |
| MSP-PGMA      | 457                          | 0.057      | $-22.8 \pm 0.4$            |
| MSP-IDA       | 512                          | 0.015      | $-45.8 \pm 0.9$            |
| MSP-AOPB      | 575                          | 0.045      | $-36.5 \pm 0.7$            |

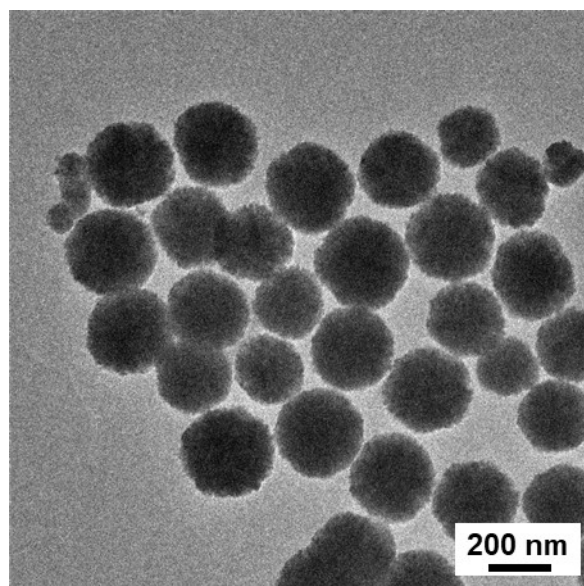

**Figure S1** TEM image of MSP nanoparticles.

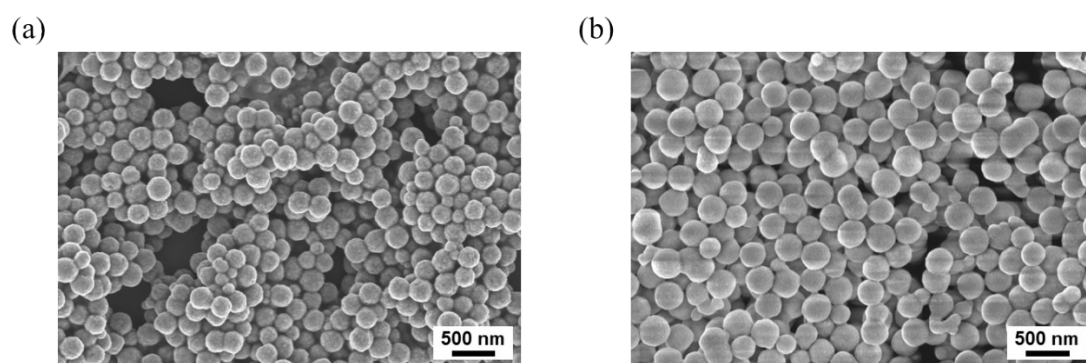

**Figure S2** SEM images of (a) MSP and (b) MSP-AOPB nanoparticles.

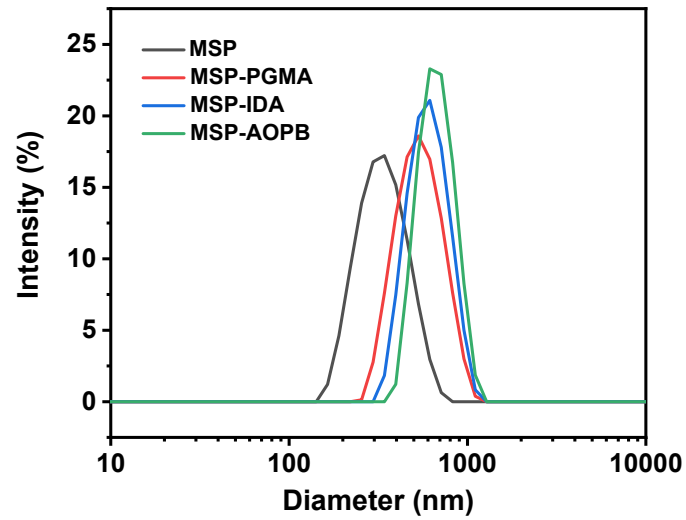

**Figure S3** DLS plots of MSP, MSP-PGMA, MSP-IDA and MSP-AOPB dispersions.

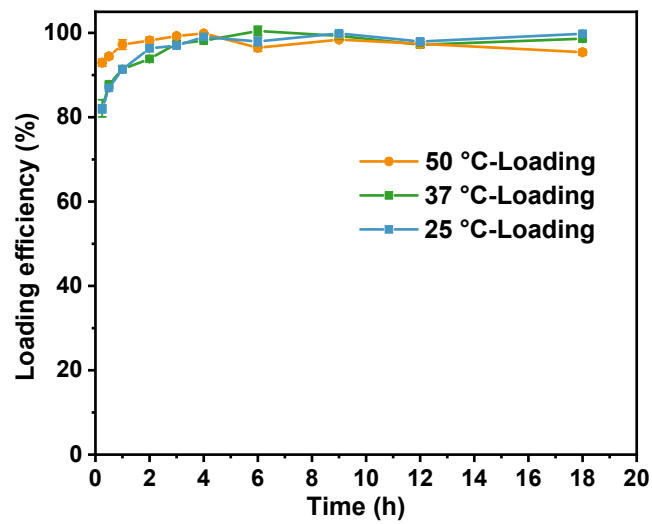

**Figure S4** Loading efficiency of Tf on MSP-AOPB NPs at different temperatures and time. Results are presented as mean  $\pm$  SD, n = 3 per group.

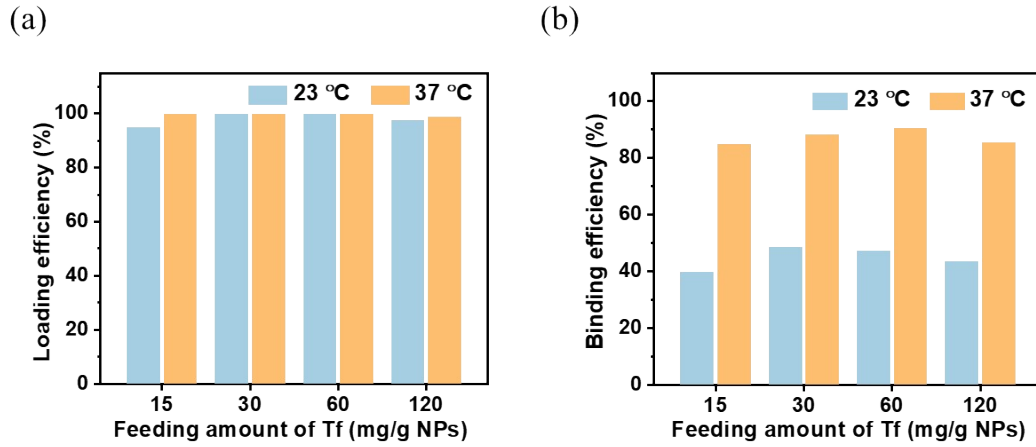

**Figure S5** (a) Loading efficiency and (b) binding efficiency of Tf on MSP-AOPB NPs at different initial feeding amounts of Tf and temperatures.

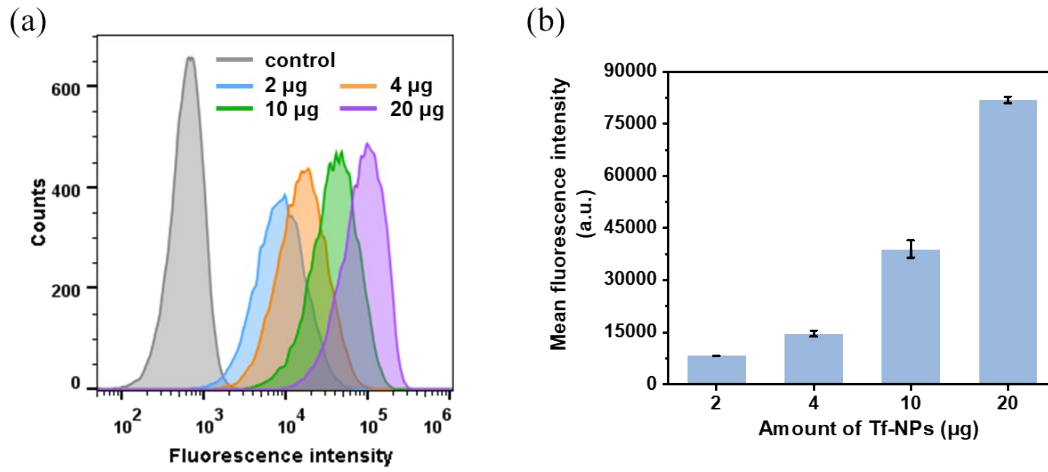

**Figure S6** Cellular uptake of Tf-MSP-AOPB (abbreviated as Tf-NPs) determined by flow cytometry. (a) Fluorescence intensity of Tf-NPs in HepG2 cells. The amount of Tf-NPs incubated with HepG2 cells was 2  $\mu$ g, 4  $\mu$ g, 10  $\mu$ g and 20  $\mu$ g. (b) Quantitative fluorescence intensity analysis of panel (a). Results are presented as mean  $\pm$  SD, n = 3 per group.

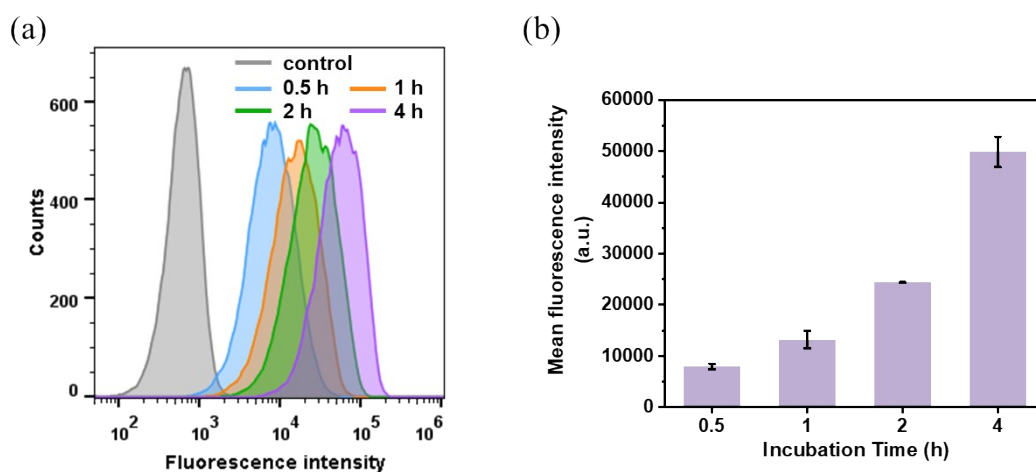

**Figure S7** Cellular uptake of Tf-MSP-AOPB (abbreviated as Tf-NPs) determined by flow cytometry. (a) Fluorescence intensity of Tf-NPs in HepG2 cells. Incubation time for Tf-NPs and HepG2 cells was 0.5 h, 1 h, 2 h and 4 h. (b) Quantitative fluorescence intensity analysis of panel (a). Results are presented as mean  $\pm$  SD,  $n = 3$  per group.

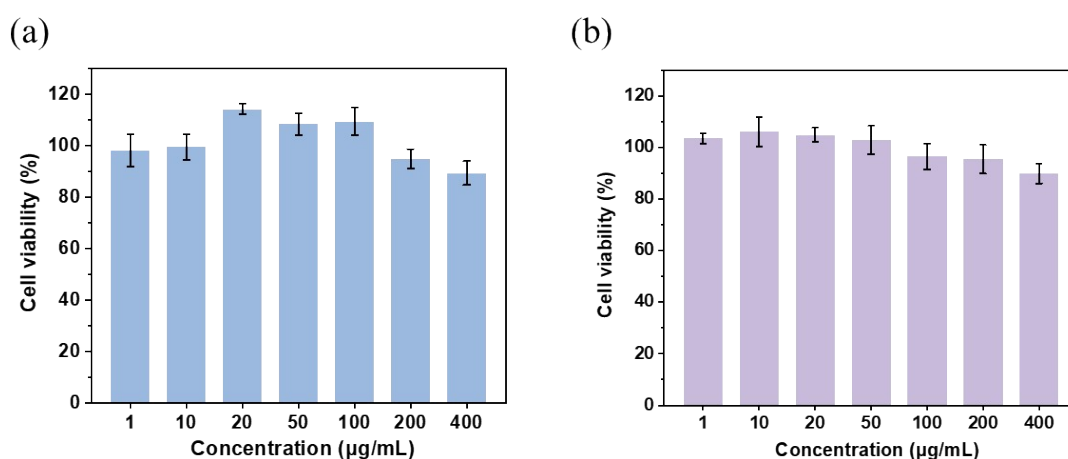

**Figure S8** Cell viability of MSP-AOPB NPs to (a) HEK 293T cells and (b) HepG2 cells after incubation for 24 h. Results are presented as mean  $\pm$  SD,  $n = 6$  per group.
